# Supplementary material for: Multidentate Lewis acids: synthesis, structure and mode of action of a redox-based fluoride ion sensorElectronic supplementary information (ESI) available: details of NMR and UV/Vis spectroscopic measurements. See http://www.rsc.org/suppdata/cc/b2/b200828a/
Source: Royal Society of Chemistry journal article supplement (doi:10.1039/b200828a), 2002-03-07
Supplement: b200828a1.doc [file b200828a1.doc]

Supplementary Material (ESI) for Chemical Communications

This journal is © The Royal Society of Chemistry 2002

Correspondence and proofs to: Dr Simon Aldridge

Cardiff University

Address as below

AldridgeS@cardiff.ac.uk

Tel: (029) 20875495

Fax: (029) 20874030

**Multidentate Lewis acids: synthesis, structure and mode of action of a redox-based fluoride ion sensor.**

S. Aldridge,*a* C. Bresner,*a* I.A. Fallis,*a* S.J. Coles,*b* and M.B. Hursthouse.*b*

*a* Department of Chemistry, Cardiff University, PO Box 912, Park Place, Cardiff, UK CF10 3TB.

*b* Department of Chemistry, University of Southampton, Highfield, Southampton, UK SO17 1BJ.

# Supplementary Data

**1. Changes in 11B and 19F NMR spectra on complexation of two equivalents of F- to 2**

Addition of >2 equivalents of *n*Bu4NF to a solution of **2** results in an upfield shift in the measured 11B resonance from B 34.0 to 8.3 and in the appearance of a signal at F –137.0 in the 19F NMR spectrum. This shift in the 11B signal is consistent with that expected on complexation of an anionic donor to a three-coordinate boron centre {*c.f.* B 28.4 for PhB(OH)2, B 3.2 for PhB(OH)3-}.1 Furthermore, the chemical shift of the new species observed by 19F NMR is consistent with fluoride bound to a boron centre (*c.f.* F ‑152.6 for *n*Bu4NBF4 in CDCl3).

(1. G.R. Eaton, W.N. Lipscomb, in *NMR Studies of Boron Hydrides and Related Species*, Benjamin, 1969).

**2. 1H NMR titration data and calculation of K1 and K2**

For an equilibrium of the type

K1 K2

X + 2F-  Y + F-  Z

The observed chemical shift (assuming rapid exchange on the NMR timescale) is given by

obs = mxx + myy + mzz

where mi and i refer to the mole fraction and NMR chemical shift of component I, respectively. Hence

obs = (1 - my - mz)x + myy + mzz = x + (y – x)my + (z – x)mz

and therefore

obs = x + (1/[X]o){(y – x)[Y] + (z – x)[Z]}

where [i] refers to the concentration of component i and [X]o refers to the initial concentration of component X ([X]o = [X] + [Y] + [Z] thereafter).

But

[Y] = K1[F-][X] and [Z] = K2[F-][Y] = K1K2[F-]2[X]

So

obs = x + ([X]/[X]o){(y – x)K1[F-] + (z – x)K1K2[F-]2}

and

[X]o = [X] + [Y] + [Z] = [X] + K1[F-][X] + K1K2[F-]2[X]

Therefore

[X]/[X]o = 1/(1 + K1[F-] + K1K2[F-]2)

and

obs = x + {1/(1 + K1[F-] + K1K2[F-]2)}{(y – x)K1[F-] + (z – x)K1K2[F-]2}

In the limit of high fluoride concentration (*i.e.* [F-] >> 1) this simplifies to

obs = x + {1/(K1K2[F-]2)}{(z – x)K1K2[F-]2} = x + (z – x) = z

whereas at low fluoride concentration (*i.e.* [F-] << 1) it gives

**obs = x + (y – x)K1[F-] + (z – x)K1K2[F-]2**

This expression implies that at low fluoride concentration the relationship between obs and [F-] ought to be a quadratic expression of the type

obs = a+ b[F-] + c[F-]2

where a = x, b = (y – x)K1 and c = (z – x)K1K2

For the equilibrium

**2** + 2F-  [**2.**F]- + F-  [**2.**2F]2-

at low fluoride concentration ([F-] < 0.08 mol dm-3) the relationship between obs and [F-] can indeed be fitted to such a relationship (*R*2 = 0.9949):

obs = 5.2833- (0.7854)[F-] – (15.472)[F-]2

from which values of K1 and K2 can be obtained

K1 = 4.1 mol-1 dm3

K2 = 9.8 mol-1 dm3

By taking z = 4.900 ppm and y = (x + y)/2 = 5.091 ppm.
