# Supplementary material for: Multidentate Lewis acids: synthesis, structure and mode of action of a redox-based fluoride ion sensorElectronic supplementary information (ESI) available: details of NMR and UV/Vis spectroscopic measurements. See http://www.rsc.org/suppdata/cc/b2/b200828a/
Source: Royal Society of Chemistry journal article supplement (doi:10.1039/b200828a), 2002-03-07
Supplement: b200828a2.doc [file b200828a2.doc]

Supplementary Material (ESI) for Chemical Communications

This journal is © The Royal Society of Chemistry 2002

**Figure S1** Plot of chemical shift (H) *vs.* fluoride ion concentration, for the methine protons of the cyclic boronate fragment of **2**. Fitting of data for [F-] < 0.08 M to a quadratic function, consistent with binding of two equivalents of fluoride.

**Figure S2** UV/Visible spectrum of a chloroform solution of the ferrocenium species [**2**.2F]- (*ca.* 0.5 mM).

**Figure S3** UV/Visible spectra of a chloroform solution of **2** (*ca.* 0.5 mM).
